# Supplementary material for: Real-World Efficacy and Safety of Apremilast in Belgian Patients with Psoriatic Arthritis: Results from the Prospective Observational APOLO Study
Source: PubMed Central journal article supplement — Adv Ther. 2022 Jan 3;39(2):1055–67. doi: 10.1007/s12325-021-02016-x (PMC8866349; doi:10.1007/s12325-021-02016-x), 2022-01-03
Supplement: 12325_2021_2016_MOESM1_ESM.pdf [file 12325_2021_2016_MOESM1_ESM.pdf]

**Real-world efficacy and safety of apremilast in Belgian patients with psoriatic arthritis:**

**Results from the prospective observational APOLO study**

Kurt de Vlam<sup>1,2</sup>, Adrien Nzeusseu Toukap<sup>3</sup>, Marie-Joëlle Kaiser<sup>4</sup>, Johan Vanhoof<sup>5</sup>, Philip Remans<sup>5</sup>, Marthe Van den Berghe<sup>6</sup>, Silvana Di Romana<sup>7</sup>, Filip Van den Bosch<sup>8</sup>, Rik Lories<sup>1,2,\*</sup>

<sup>1</sup>Division of Rheumatology, University Hospitals Leuven, KU Leuven, Leuven, Belgium

<sup>2</sup>Department of Development and Regeneration, Skeletal Biology and Engineering Research Center, KU Leuven, Leuven, Belgium

<sup>3</sup>Rheumatology department, Saint-Luc University Hospital, Brussels, Belgium

<sup>4</sup>Department of Rheumatology, GIGA Research, CHU Liège, Liège, Belgium

<sup>5</sup>Department of Rheumatology, ReumaClinic Genk, Genk, Belgium

<sup>6</sup>Department of Rheumatology, ASZ Aalst, Aalst, Belgium

<sup>7</sup>Department of Rheumatology, University Hospital Saint-Pierre, Brussels, Belgium

<sup>8</sup>Department of Rheumatology, Ghent University Hospital, Gent, Belgium

**\*Corresponding author:**

Prof. Rik Lories

Division of Rheumatology, University Hospitals Leuven, KU Leuven, Leuven, Belgium;

Department of Development and Regeneration, Skeletal Biology and Engineering Research Center, KU Leuven, Leuven, Belgium

Email: [Rik.Lories@kuleuven.be](mailto:Rik.Lories@kuleuven.be)

## Supplementary materials

**Table S1. Concomitant medications for psoriatic arthritis at inclusion and during the study (Safety Analysis Set; N = 106).**

| Concomitant medications for PsA                                                 | At enrolment | During the study |
|---------------------------------------------------------------------------------|--------------|------------------|
| <b>Patients with <math>\geq 1</math> concomitant PsA treatment, n (%)</b>       | 68 (64.2)    | 29 (27.4)        |
| <b>csDMARDs, n (%)</b>                                                          | 41 (38.7)    | 10 (9.4)         |
| Methotrexate                                                                    | 27 (25.5)    | 7 (6.6)          |
| Leflunomide                                                                     | 10 (9.4)     | 2 (1.9)          |
| Sulfasalazine                                                                   | 8 (7.5)      | 1 (0.9)          |
| <b>bDMARDs, n (%)</b>                                                           | -            | 1 (0.9)          |
| Ustekinumab                                                                     | -            | 1 (0.9)          |
| <b>NSAIDs, n (%)</b>                                                            | 28 (26.4)    | 14 (13.2)        |
| Etoricoxib                                                                      | 7 (6.6)      | 3 (2.8)          |
| Celecoxib                                                                       | 1 (0.9)      | -                |
| Ibuprofen                                                                       | 4 (3.8)      | 2 (1.9)          |
| Naproxen                                                                        | 3 (2.8)      | 2 (1.9)          |
| Ketoprofen                                                                      | 1 (0.9)      | 1 (0.9)          |
| Diclofenac                                                                      | 7 (6.6)      | 2 (1.9)          |
| Meloxicam                                                                       | 3 (2.8)      | 1 (0.9)          |
| Piroxicam                                                                       | 1 (0.9)      | -                |
| Buprenorphine                                                                   | 1 (0.9)      | -                |
| Nabumetone                                                                      | 1 (0.9)      | -                |
| Oxaprozin                                                                       | -            | 1 (0.9)          |
| Arthrotec                                                                       | -            | 1 (0.9)          |
| Pregabalin                                                                      | -            | 1 (0.9)          |
| Unspecified herbal and traditional medicine ( <i>Symphytum officinale</i> root) | 1 (0.9)      | -                |
| <b>Corticosteroids</b>                                                          | 21 (19.8)    | 12 (11.3)        |
| Methylprednisolone                                                              | 12 (11.3)    | 8 (7.5)          |
| Prednisolone                                                                    | 6 (5.7)      | 2 (1.9)          |
| Prednisone                                                                      | 2 (1.9)      | 1 (0.9)          |
| Corticosteroids, combinations for treatment of acne (Methylprednisolone)        | 1 (0.9)      | -                |
| Diprosan                                                                        | -            | 2 (1.9)          |
| <b>Others</b>                                                                   | 6 (5.7)      | -                |

|             |         |         |
|-------------|---------|---------|
| Folic acid  | 3 (2.8) | -       |
| Paracetamol | 4 (3.8) | 1 (0.9) |
| Ultracet    | 1 (0.9) | -       |
| Tramadol    | 1 (0.9) | 2 (1.9) |

bDMARDs, biologic disease-modifying anti rheumatic drugs; csDMARDs, conventional synthetic disease-modifying anti rheumatic drugs; NSAIDs, non-steroidal anti-inflammatory drugs; PsA, psoriatic arthritis.

**Table S2a:** PsARC Response at Month 6 – SAF

| <b>Outcome</b>                                                             | <b>SAF (N=106)</b> |
|----------------------------------------------------------------------------|--------------------|
| PsARC response, n (%)                                                      |                    |
| Yes                                                                        | 32 (30.2)          |
| No                                                                         | 17 (16.0)          |
| Missing data                                                               | 57 (53.8)          |
| PsARC response rate in patients with non-missing data, n (%); <i>n</i> =49 | 32 (65.3)          |

*n*=number of subjects in each category. PsARC: Psoriatic Arthritis Response Criteria; SAF, Safety Analysis Set

**Table S2b: PsARC Components – SAF**

|                       | <b>Apremilast<br/>initiation</b> | <b>Month 3</b> | <b>Month 6</b> | <b>Month 9</b> | <b>Month 12</b> |
|-----------------------|----------------------------------|----------------|----------------|----------------|-----------------|
| <b>68-joint count</b> |                                  |                |                |                |                 |
| <i>n</i>              | <b>96</b>                        | <b>66</b>      | <b>63</b>      | <b>27</b>      | <b>26</b>       |
| Median                | 10                               | 3              | 3              | 5              | 2               |
| [Min-max]             | [0-61]                           | [0-55]         | [0-50]         | [0-30]         | [0-19]          |
| <b>66-joint count</b> |                                  |                |                |                |                 |
| <i>n</i>              | <b>96</b>                        | <b>66</b>      | <b>63</b>      | <b>27</b>      | <b>26</b>       |
| Median                | 6                                | 2              | 1              | 2              | 0               |
| [Min-max]             | [0-31]                           | [0-25]         | [0-13]         | [0-12]         | [0-17]          |
| <b>PGA, n (%)</b>     |                                  |                |                |                |                 |
| <i>n</i>              | <b>90</b>                        | <b>60</b>      | <b>59</b>      | <b>26</b>      | <b>23</b>       |
| 1                     | 5 (5.6)                          | 16 (26.7)      | 22 (37.3)      | 12 (46.2)      | 12 (52.2)       |
| 2                     | 10 (11.1)                        | 25 (41.7)      | 16 (27.1)      | 2 (7.7)        | 4 (17.4)        |
| 3                     | 36 (40.0)                        | 12 (20.0)      | 14 (23.7)      | 8 (30.8)       | 4 (17.4)        |
| 4                     | 34 (37.8)                        | 6 (10.0)       | 7 (11.9)       | 3 (11.5)       | 3 (13.0)        |
| 5                     | 5 (5.6)                          | 1 (1.7)        | 0 (0.0)        | 1 (3.8)        | 0 (0.0)         |
| Missing, n            | 11                               | 16             | 9              | 7              | 7               |
| <b>PtGA, n (%)</b>    |                                  |                |                |                |                 |
| <i>n</i>              | <b>94</b>                        | <b>64</b>      | <b>56</b>      | <b>22</b>      | <b>25</b>       |
| 1                     | 1 (1.1)                          | 6 (9.4)        | 11 (19.6)      | 5 (22.7)       | 7 (28.0)        |
| 2                     | 13 (13.8)                        | 16 (25.0)      | 15 (26.8)      | 7 (31.8)       | 4 (16.0)        |
| 3                     | 34 (36.2)                        | 22 (34.4)      | 18 (32.1)      | 5 (22.7)       | 10 (40.0)       |
| 4                     | 35 (37.2)                        | 14 (21.9)      | 10 (17.9)      | 3 (13.6)       | 3 (12.0)        |
| 5                     | 11 (11.7)                        | 6 (9.4)        | 2 (3.6)        | 2 (9.1)        | 1 (4.0)         |
| Missing, n            | 7                                | 12             | 12             | 11             | 5               |

*n*=number of subjects with non-missing data; percentage calculated from the number of patients with non-missing data.

PGA: Physician Global Assessment; PsARC: Psoriatic Arthritis Response Criteria; PtGA: Patient Global Assessment; SAF: Safety Analysis Set.

**Table S3: PsARC Components - REF**

|                       | <b>Apremilast<br/>initiation</b> | <b>Month 3</b> | <b>Month 6</b> | <b>Month 9</b> | <b>Month 12</b> |
|-----------------------|----------------------------------|----------------|----------------|----------------|-----------------|
| <b>68-joint count</b> |                                  |                |                |                |                 |
| <i>n</i>              | <b>65</b>                        | <b>44</b>      | <b>58</b>      | <b>24</b>      | <b>25</b>       |
| Median                | 10                               | 3              | 3              | 3              | 2               |
| [Min-max]             | [3-61]                           | [0-41]         | [0-50]         | [0-30]         | [0-18]          |
| <b>66-joint count</b> |                                  |                |                |                |                 |
| <i>n</i>              | <b>65</b>                        | <b>44</b>      | <b>58</b>      | <b>24</b>      | <b>25</b>       |
| Median                | 6                                | 1              | 1              | 1              | 0               |
| [Min-max]             | [0-29]                           | [0-25]         | [0-13]         | [0-12]         | [0-17]          |
| <b>PGA, n (%)</b>     |                                  |                |                |                |                 |
| <i>n</i>              | <b>61</b>                        | <b>39</b>      | <b>54</b>      | <b>23</b>      | <b>21</b>       |
| 1                     | 5 (8.2)                          | 13 (33.3)      | 22 (40.7)      | 12 (52.2)      | 12 (57.1)       |
| 2                     | 5 (8.2)                          | 17 (43.6)      | 15 (27.8)      | 2 (8.7)        | 3 (14.3)        |
| 3                     | 24 (39.3)                        | 7 (17.9)       | 11 (20.4)      | 6 (26.1)       | 4 (19.0)        |
| 4                     | 25 (41.0)                        | 2 (5.1)        | 6 (11.1)       | 3 (13.0)       | 2 (9.5)         |
| 5                     | 2 (3.3)                          | 0 (0.0)        | 0 (0.0)        | 0 (0.0)        | 0 (0.0)         |
| Missing, n            | 8                                | 11             | 8              | 7              | 7               |
| <b>PtGA, n (%)</b>    |                                  |                |                |                |                 |
| <i>n</i>              | <b>63</b>                        | <b>40</b>      | <b>51</b>      | <b>20</b>      | <b>24</b>       |
| 1                     | 1 (1.6)                          | 3 (7.5)        | 11 (21.6)      | 4 (20.0)       | 7 (29.2)        |
| 2                     | 8 (12.7)                         | 12 (30.0)      | 13 (25.5)      | 7 (35.0)       | 4 (16.7)        |
| 3                     | 24 (38.1)                        | 17 (42.5)      | 16 (31.4)      | 5 (25.0)       | 9 (37.5)        |
| 4                     | 23 (36.5)                        | 6 (15.0)       | 9 (17.6)       | 2 (10.0)       | 3 (12.5)        |
| 5                     | 7 (11.1)                         | 2 (5.0)        | 2 (3.9)        | 2 (10.0)       | 1 (4.2)         |
| Missing, n            | 6                                | 10             | 11             | 10             | 4               |

*n*=number of subjects with non-missing data; percentage calculated from the number of patients with non-missing data.

PGA: Physician Global Assessment; PsARC: Psoriatic Arthritis Response Criteria; PtGA: Patient Global Assessment; REF: Reference set.

**Table S4:** PsAID12 and HAQ-DI subscores

|                                                                      | <b>Apremilast<br/>initiation</b> | <b>Month 3</b> | <b>Month 6</b> |
|----------------------------------------------------------------------|----------------------------------|----------------|----------------|
| <b>PsAID12 subscores<sup>a</sup> (PsAID12 &gt;4<br/>at baseline)</b> | <b>n = 60</b>                    | <b>n = 36</b>  | <b>n = 47</b>  |
| Pain                                                                 | 7.1 (1.5)                        | 5.1 (2.2)      | 4.8 (2.4)      |
| Fatigue                                                              | 7.2 (1.9)                        | 6.1 (2.1)      | 5.4 (2.3)      |
| Skin problems                                                        | 5.7 (2.8)                        | 4.0 (3.0)      | 4.0 (2.8)      |
| Work and/or leisure activities                                       | 6.9 (2.1)                        | 6.0 (2.5)      | 4.6 (2.8)      |
| Functional capacity                                                  | 6.8 (2.1)                        | 5.7 (2.4)      | 4.7 (2.7)      |
| Discomfort                                                           | 6.9 (1.9)                        | 5.5 (2.2)      | 4.6 (2.7)      |
| Sleep disturbance                                                    | 6.0 (2.6)                        | 5.0 (3.0)      | 4.4 (2.9)      |
| Coping                                                               | 6.3 (1.8)                        | 5.1 (2.6)      | 4.0 (2.5)      |
| Anxiety/fear and uncertainty                                         | 5.4 (2.7)                        | 4.9 (3.1)      | 3.8 (2.9)      |
| Embarrassment and/or shame                                           | 4.9 (3.3)                        | 4.1 (3.1)      | 3.3 (2.9)      |
| Social participation                                                 | 5.6 (2.7)                        | 4.3 (3.0)      | 3.9 (2.7)      |
| Depression                                                           | 4.1 (2.9)                        | 3.9 (3.1)      | 2.7 (2.8)      |
| <b>HAQ-DI domain scores<sup>a</sup></b>                              | <b>n = 67</b>                    | <b>n = 43</b>  | <b>n = 54</b>  |
| Dressing and grooming                                                | 1.5 (0.7)                        | 1.0 (0.6)      | 0.9 (0.7)      |
| Arising                                                              | 1.3 (0.8)                        | 1.0 (0.7)      | 0.9 (0.7)      |
| Eating                                                               | 1.5 (0.8)                        | 1.1 (0.9)      | 0.8 (0.9)      |
| Walking                                                              | 1.1 (0.8)                        | 1.0 (0.9)      | 0.8 (0.8)      |
| Hygiene                                                              | 1.4 (0.8)                        | 1.3 (1.0)      | 0.9 (0.9)      |
| Reach                                                                | 1.6 (0.8)                        | 1.3 (0.9)      | 1.2 (0.9)      |
| Grip                                                                 | 1.6 (0.8)                        | 1.2 (0.8)      | 1.0 (0.9)      |
| Activities                                                           | 1.7 (0.8)                        | 1.4 (0.8)      | 1.3 (0.9)      |

<sup>a</sup>Values represent mean (SD). *n*=number of subjects with non-missing data under specific category. HAQ-DI: Health Assessment Questionnaire Disability Index; PsAID12: Psoriatic Arthritis Impact of Disease 12; SD: Standard deviation.

**Figure S1.** Effect of apremilast on PsARC subscores at month 6 (SAF)

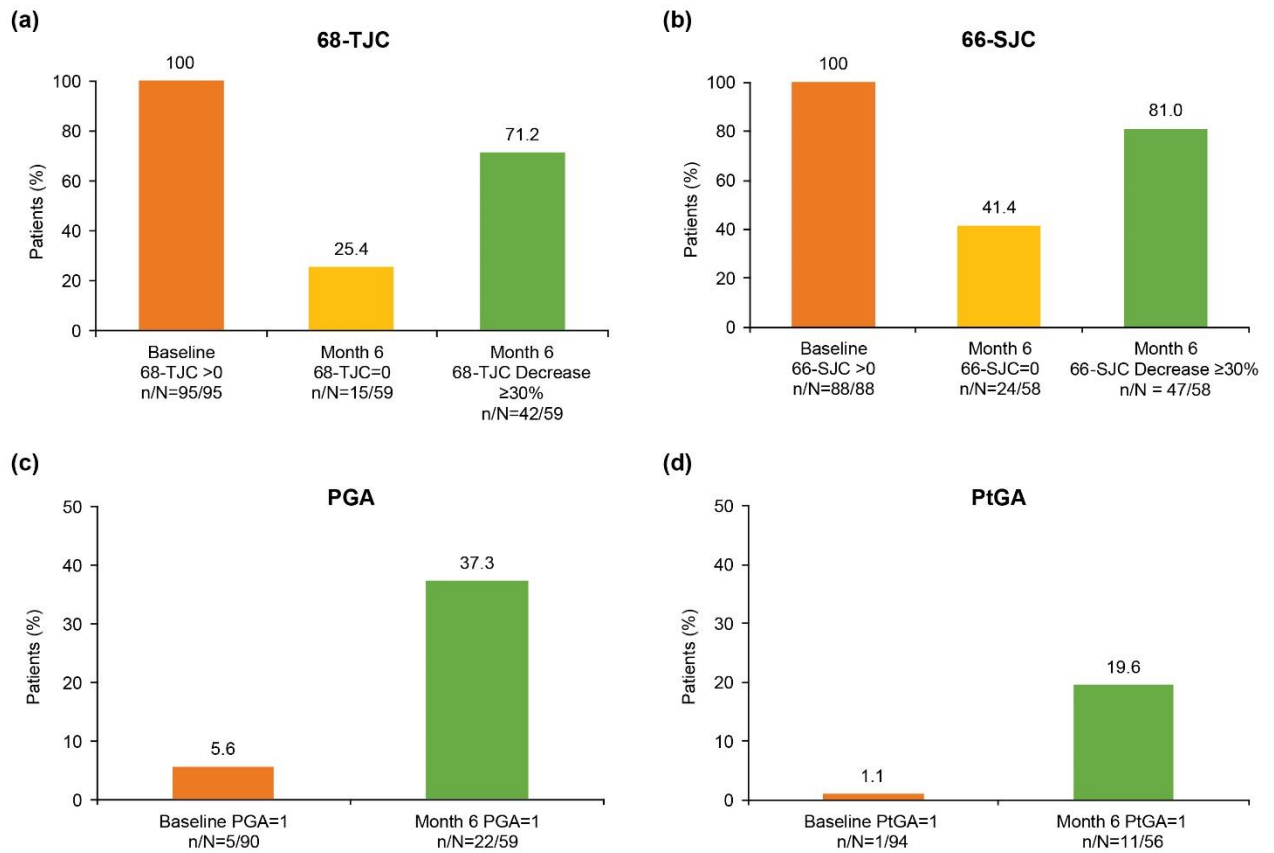

*n*=number of patients with desired outcome of interest; *N*=number of patients with non-missing data available at that timepoint.

66-SJC: 66-joint count for swelling; 68-TJC: 68-joint count for pain/tenderness; PGA:

Physician Global Assessment; PsARC: Psoriatic Arthritis Response Criteria; PtGA: Patient

Global Assessment; SAF: Safety Analysis Set.

**Figure S2.** Effect of apremilast on enthesitis and dactylitis at 6 months of treatment (SAF)

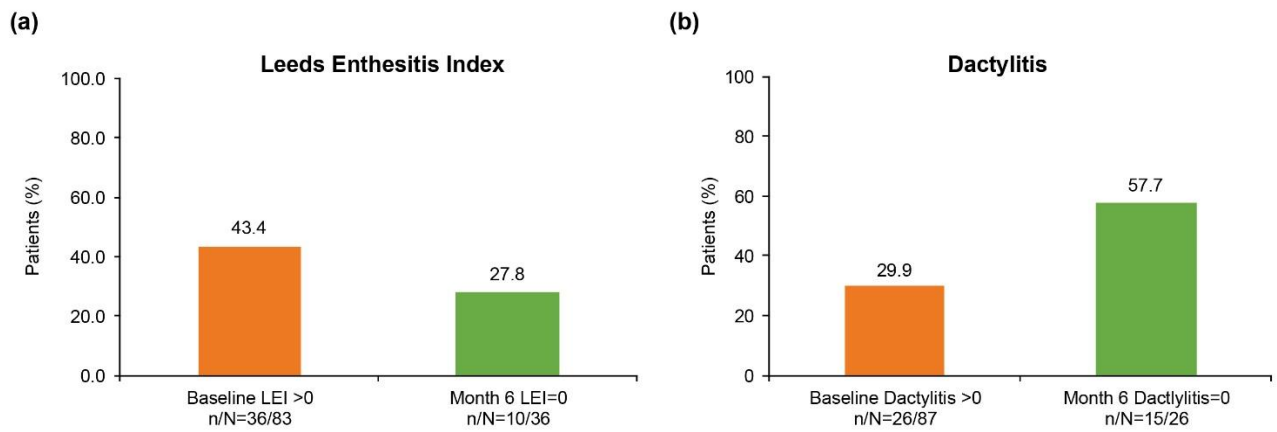

*n*=number of patients with desired outcome of interest at specific timepoint.

*N*=number of patients with non-missing data at that timepoint

LEI: Leeds Enthesitis Index; SAF: Safety Analysis Set.



**Figure S3.** Change in PsAID12 scores among patients with global score >4 at apremilast initiation a) Individual scores and b) Overall score (SAF)

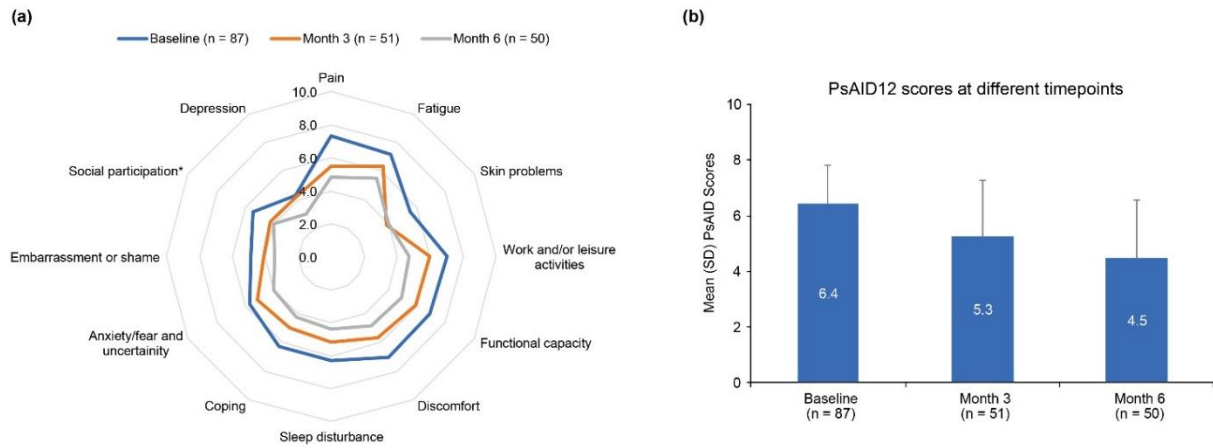

\*Data were available for only 49 patients at 6 months for social participation domain.

*n*=number of subjects with non-missing data at each timepoint.

PsAID12 ranges from 0-10, 10=worst health score

PsAID12: Psoriatic Arthritis Impact of Disease 12; SAF: Safety Analysis Set; SD: Standard deviation.

**Figure S4.** Change in HAQ-DI a) Individual scores and b) Overall score (SAF)

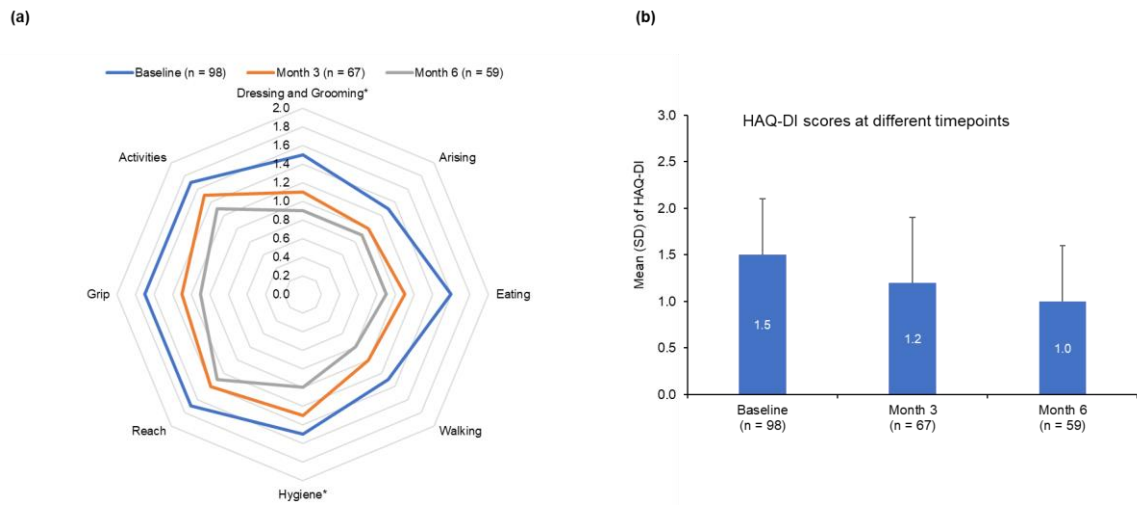

\*Data were available for only 66 and 65 patients at month 3 for dressing and grooming and hygiene domains, respectively.

HAQ-DI: Health Assessment Questionnaire Disability Index; SAF: Safety Analysis Set; SD: Standard deviation.
